# Supplementary material
Source: PubMed Central journal article supplement (PMC6602603)
Supplement: ct9-10-e00012-s001.pdf [file ct9-10-e00012-s001.pdf]

## **Supplementary Materials**

### **Search strategy:**

“irritable bowel syndrome” OR “IBS”

AND

“microbiota” OR “microbes” OR “microbiome” OR “microflora”

AND

“sequence” OR “sequencing” OR “pyrosequencing” OR “high through put” OR “16S rRNA” OR

“16S ribosomal RNA”

**Supplementary Table 1:** Quality assessment of the included studies

| Author                                      | Selection criteria |                                 |                       |                        | Comparability criteria | Exposure criteria         |                                    |                   | Total |   |
|---------------------------------------------|--------------------|---------------------------------|-----------------------|------------------------|------------------------|---------------------------|------------------------------------|-------------------|-------|---|
|                                             | Case definition    | Representativeness of the cases | Selection of controls | Definition of controls |                        | Ascertainment of exposure | Same method for cases and controls | Non-response rate |       |   |
| Li et al. <sup>17</sup>                     | 1                  | 0                               | 0                     | 1                      | 1                      | 0                         | 1                                  | 1                 | 0     | 5 |
| Labus et al. <sup>18</sup>                  | 1                  | 0                               | 1                     | 1                      | 1                      | 0                         | 1                                  | 1                 | 1     | 7 |
| Tap et al. <sup>19</sup>                    | 1                  | 1                               | 0                     | 1                      | 1                      | 0                         | 1                                  | 1                 | 0     | 6 |
| Gobert et al. <sup>20</sup>                 | 1                  | 0                               | 0                     | 1                      | 1                      | 0                         | 1                                  | 1                 | 1     | 6 |
| Liu et al. <sup>21</sup>                    | 1                  | 1                               | 0                     | 1                      | 1                      | 0                         | 1                                  | 1                 | 1     | 7 |
| Zeber-Lubecka et al. <sup>22</sup>          | 1                  | 1                               | 0                     | 1                      | 1                      | 0                         | 1                                  | 1                 | 1     | 7 |
| Nagel et al. <sup>23</sup>                  | 1                  | 1                               | 0                     | 1                      | 1                      | 0                         | 1                                  | 1                 | 0     | 6 |
| Ringel-Kulka et al. <sup>24</sup>           | 1                  | 0                               | 1                     | 1                      | 1                      | 0                         | 1                                  | 1                 | 0     | 6 |
| Chung et al. <sup>25</sup>                  | 1                  | 0                               | 1                     | 1                      | 1                      | 0                         | 1                                  | 1                 | 0     | 6 |
| Pozuelo et al. <sup>26</sup>                | 1                  | 0                               | 1                     | 1                      | 1                      | 0                         | 1                                  | 1                 | 1     | 7 |
| Giamarellos-Bourboulis et al. <sup>27</sup> | 1                  | 1                               | 0                     | 1                      | 1                      | 0                         | 1                                  | 1                 | 0     | 6 |
| Dlugosz et al. <sup>28</sup>                | 1                  | 0                               | 0                     | 1                      | 1                      | 0                         | 1                                  | 1                 | 1     | 6 |
| Ng et al. <sup>29</sup>                     | 1                  | 1                               | 1                     | 1                      | 1                      | 0                         | 1                                  | 1                 | 0     | 7 |
| Jeffery et al. <sup>30</sup>                | 1                  | 1                               | 0                     | 1                      | 1                      | 0                         | 1                                  | 1                 | 1     | 7 |
| Carroll et al. <sup>31</sup>                | 1                  | 0                               | 0                     | 1                      | 1                      | 0                         | 1                                  | 1                 | 1     | 6 |
| Durbán et al. <sup>32</sup>                 | 1                  | 0                               | 0                     | 1                      | 1                      | 0                         | 1                                  | 1                 | 1     | 6 |

Note: The Newcastle-Ottawa Scale for case-control studies contains nine items. The selection criteria include four items: (1) is the case definition adequate? (2) representativeness of the cases, (3) selection of controls, and (4) definition of controls. The comparability criteria include comparability of cases and controls on the basis of the design or analysis. The exposure criteria include three items: (1) ascertainment of exposure, (2) same method of ascertainment for cases and controls, and (3) non-response rate.

**Supplementary Table 2:** The mean relative abundances of *Firmicutes* and *Bacteroidetes*, and F/B ratio in relevant studies

| Author                             | <i>Firmicutes</i>      |         | <i>Bacteroidetes</i>   |         | F/B ratio          |       |
|------------------------------------|------------------------|---------|------------------------|---------|--------------------|-------|
|                                    | IBS patients           | HCs     | IBS patients           | HCs     | IBS patients       | HCs   |
| Labus et al. <sup>18</sup>         | IBS1: 76.0%            | 54.6%   | IBS1: 20.5%            | 44.3%   | IBS1: 1.5-2        | 0-0.5 |
|                                    | HC-like IBS: 62.4%     |         | HC-like IBS: 36.8%     |         | HC-like IBS: 0.5-1 |       |
| Jeffery et al. <sup>30</sup>       | Normal-like IBS: 56.1% | 55.7%   | Normal-like IBS: 40.1% | 40.6%   | NA                 | NA    |
|                                    | IBS cluster 1: 81.4%   |         | IBS cluster 1: 13.8%   |         |                    |       |
|                                    | IBS cluster 2: 80.4%   |         | IBS cluster 2: 10.2%   |         |                    |       |
| Nagel et al. <sup>23</sup>         | 49.812%                | 41.431% | 34.623%                | 47.700% | 7.13               | 2.28  |
| Chung et al. <sup>25</sup>         | 40.7%                  | 38.2%   | 41.3%                  | 45.8%   | IBS-D: 17.15       | 6.43  |
|                                    |                        |         |                        |         | IBS-M: 13.42       |       |
|                                    |                        |         |                        |         | IBS-C: 0.73        |       |
| Zeber-Lubecka et al. <sup>22</sup> | NA                     | NA      | NA                     | NA      | NA                 | NA    |
| Liu et al. <sup>21</sup>           | NA                     | NA      | NA                     | NA      | NA                 | NA    |
| Pozuelo et al. <sup>26</sup>       | 39.8%                  | 49%     | 52.6%                  | 42.7%   | NA                 | NA    |

IBS, irritable bowel syndrome; HC, healthy control; NA, not available.

**Supplementary Table 3:** Alterations of fecal microbiota composition in irritable bowel syndrome (IBS) patients at the genus level

| Author                      | Genus                                  |
|-----------------------------|----------------------------------------|
| Labus et al. <sup>18</sup>  | <i>Holdemania</i> ↑                    |
|                             | <i>Parabacteroides</i> ↓               |
| Tap et al. <sup>19</sup>    | <i>Bacteroides</i> ↑                   |
|                             | <i>Prevotella</i> ↓                    |
| Gobert et al. <sup>20</sup> | <i>Roseburia</i> ↓                     |
|                             | <i>Prevotella</i> ↑                    |
|                             | <i>Alistipes</i> ↑                     |
|                             | <i>Desulfovibrio</i> ↑                 |
| Liu et al. <sup>21</sup>    | <i>Akkermensia</i> ↑                   |
|                             | <i>Faecalibacterium</i> ↓              |
|                             | <i>Lachnospiracea_incertae_sedis</i> ↓ |
|                             | <i>Blautia</i> ↓                       |
|                             | <i>Coprococcus</i> ↓                   |
|                             | <i>Ruminococcus</i> ↓                  |
|                             | <i>Mitsuokella</i> ↓                   |
|                             | <i>Megamonas</i> ↓                     |
|                             | <i>Clostridium XI</i> ↓                |
|                             | <i>Dialister</i> ↓                     |
|                             | <i>Oscillibacter</i> ↓                 |
|                             | <i>Clostridium sensu stricto</i> ↓     |
|                             | <i>Clostridium IV</i> ↓                |
|                             | <i>Catenibacterium</i> ↑               |
|                             | <i>Clostridium XIVb</i> ↓              |
|                             | <i>Prevotella</i> ↑                    |
|                             | <i>Bacteroides</i> ↑                   |
|                             | <i>Barnesiella</i> ↓                   |
|                             | <i>Paraprevotella</i> ↑                |
|                             | <i>Odoribacter</i> ↓                   |
|                             | <i>Butyricimonas</i> ↓                 |
|                             | <i>Alistipes</i> ↓                     |
|                             | <i>Escherichia/Shigella</i> ↓          |
|                             | <i>Parasutterella</i> ↓                |
|                             | <i>Gemmiger</i> ↓                      |
|                             | <i>Comamonas</i> ↓                     |
|                             | <i>Bifidobacterium</i> ↓               |
| <i>Fusobacterium</i> ↓      |                                        |

| Author                                                                                                                                        | Genus                                  |                        |
|-----------------------------------------------------------------------------------------------------------------------------------------------|----------------------------------------|------------------------|
| Zeber-Lubecka et al. <sup>22</sup>                                                                                                            | IBS-C:                                 |                        |
|                                                                                                                                               | <i>Eubacterium</i> ↑                   |                        |
|                                                                                                                                               | <i>Acetanaerobacterium</i> ↑           |                        |
|                                                                                                                                               | <i>Catenibacterium</i> ↑               |                        |
|                                                                                                                                               | <i>Uncultured Ruminococcaceae</i> ↑    |                        |
|                                                                                                                                               | <i>Bacteroides</i> ↓                   |                        |
|                                                                                                                                               | <i>Granulicatella</i> ↑                |                        |
|                                                                                                                                               | <i>Parabacteroides</i> ↓               |                        |
|                                                                                                                                               | IBS-D:                                 |                        |
|                                                                                                                                               | <i>Alistipes</i> ↓                     |                        |
| Nagel et al. <sup>23</sup>                                                                                                                    | <i>Enterococcus</i> ↑                  |                        |
|                                                                                                                                               | <i>Streptococcus</i> ↑                 |                        |
|                                                                                                                                               | <i>Anaerostipes</i> ↑                  |                        |
|                                                                                                                                               | <i>Blautia</i> ↑                       |                        |
|                                                                                                                                               | <i>Lachnospiracea_incertae_sedis</i> ↑ |                        |
|                                                                                                                                               | <i>Peptococcus</i> ↓                   |                        |
|                                                                                                                                               | <i>Papillibacter</i> ↑                 |                        |
|                                                                                                                                               | <i>Cantenibacterium</i> ↓              |                        |
|                                                                                                                                               | <i>Allisonella</i> ↓                   |                        |
|                                                                                                                                               | <i>Dialister</i> ↓                     |                        |
|                                                                                                                                               | <i>Butyricimonas</i> ↓                 |                        |
|                                                                                                                                               | <i>Parabacteroides</i> ↓               |                        |
|                                                                                                                                               | <i>Gemmiger</i> ↑                      |                        |
|                                                                                                                                               | <i>Actinomyces</i> ↑                   |                        |
|                                                                                                                                               | <i>Eggethella</i> ↑                    |                        |
|                                                                                                                                               | <i>Gordonibacter</i> ↑                 |                        |
|                                                                                                                                               | <i>Olsenella</i> ↓                     |                        |
|                                                                                                                                               | <i>Methanobrevibacter</i> ↑            |                        |
|                                                                                                                                               | Ringel-Kulka et al. <sup>24</sup>      | <i>Lactobacillus</i> ↑ |
|                                                                                                                                               |                                        | <i>Streptococcus</i> ↑ |
| <i>Actinomyces</i> ↑                                                                                                                          |                                        |                        |
| IBS-D/M:                                                                                                                                      |                                        |                        |
| several members of the <i>Clostridiales</i> , <i>Oscillibacter</i> , <i>Anaerovorax</i> ,<br>and a member of the <i>Incertae sedis XIII</i> ↓ |                                        |                        |
| IBS-M:                                                                                                                                        |                                        |                        |
| <i>Eubacterium</i> ↓                                                                                                                          |                                        |                        |
| IBS-C:                                                                                                                                        |                                        |                        |
| <i>Anaerovorax</i> ↑                                                                                                                          |                                        |                        |
| <i>Collinsiella</i> ↑                                                                                                                         |                                        |                        |

| Author                                   | Genus                                |
|------------------------------------------|--------------------------------------|
| Chung et al. <sup>25</sup>               | <i>Faecalibacterium</i> ↑            |
|                                          | <i>Bacteroides</i> ↓                 |
|                                          | <i>Prevotella</i> ↑                  |
|                                          | <i>Escherichia</i> ↑                 |
|                                          | <i>Klebsiella</i> ↑                  |
| Pozuelo et al. <sup>26</sup>             | IBS-D:                               |
|                                          | unknown <i>Ruminococcaceae</i> ↓     |
|                                          | IBS-D/IBS-M vs IBS-C/HCs:            |
|                                          | unknown <i>Ruminococcaceae</i> ↓     |
|                                          | unknown <i>Christensenellaceae</i> ↓ |
|                                          | <i>Akkermansia</i> ↓                 |
| Jeffery et al. <sup>30</sup>             | <i>Methanobrevibacter</i> ↓          |
|                                          | <i>Papillibacter</i> ↑               |
|                                          | <i>Dorea</i> ↑                       |
|                                          | <i>Blautia</i> ↑                     |
|                                          | <i>Dialister</i> ↑                   |
|                                          | <i>Bacteroides</i> ↓                 |
|                                          | <i>Alistipes</i> ↓                   |
|                                          | <i>Odoribacter</i> ↓                 |
|                                          | <i>Escherichia</i> ↑                 |
|                                          | <i>Actinomyces</i> ↑                 |
|                                          | <i>Bifidobacterium</i> ↑             |
|                                          | Carroll et al. <sup>31</sup>         |
| <i>Pediococcus</i> ↑                     |                                      |
| <i>Faecalibacterium</i> ↓                |                                      |
| Unclassified <i>Lactobacillaceae</i> ↑   |                                      |
| Unclassified <i>Enterobacteriaceae</i> ↑ |                                      |
| <i>Fusobacterium</i> ↑                   |                                      |
| V6:                                      |                                      |
| <i>Ethanoligenens</i> ↑                  |                                      |
| <i>Enterococcus</i> ↑                    |                                      |
| <i>Veillonella</i> ↑                     |                                      |
| Unclassified <i>Enterobacteriaceae</i> ↑ |                                      |
| Durbán et al. <sup>32</sup>              | IBS-D:                               |
|                                          | <i>Leuconostoc</i> ↑                 |
|                                          | <i>Odoribacter</i> ↑                 |
|                                          | <i>Acinetobacter</i> ↑               |
|                                          | <i>Butyricimonas</i> ↑               |
|                                          | IBS-C:                               |
|                                          | <i>Alistipes</i> ↑                   |
|                                          | <i>Butyricimonas</i> ↑               |

IBS, irritable bowel syndrome; HCs, healthy controls; IBS-D, diarrhea-predominant irritable bowel syndrome; IBS-C, constipation-predominant irritable bowel syndrome; IBS-M, mixed irritable bowel syndrome.

**Supplementary Table 4:** Alterations of fecal microbiota composition in different subtypes of irritable bowel syndrome (IBS) patients

| Author                                  | Phylum                 | Class | Order | Family                      | Genus                                   |
|-----------------------------------------|------------------------|-------|-------|-----------------------------|-----------------------------------------|
| <b>Studies involving IBS-D patients</b> |                        |       |       |                             |                                         |
| Liu et al. <sup>21</sup>                | <i>Firmicutes</i> ↓    |       |       |                             | <i>Faecalibacterium</i> ↓               |
|                                         | <i>Bacteroidetes</i> ↑ |       |       |                             | <i>Lachnospiraceae_incertae_sedis</i> ↓ |
|                                         |                        |       |       |                             | <i>Blautia</i> ↓                        |
|                                         |                        |       |       |                             | <i>Coproccoccus</i> ↓                   |
|                                         |                        |       |       |                             | <i>Ruminococcus</i> ↓                   |
|                                         |                        |       |       |                             | <i>Mitsuokella</i> ↓                    |
|                                         |                        |       |       |                             | <i>Megamonas</i> ↓                      |
|                                         |                        |       |       |                             | <i>Clostridium XI</i> ↓                 |
|                                         |                        |       |       |                             | <i>Dialister</i> ↓                      |
|                                         |                        |       |       |                             | <i>Oscillibacter</i> ↓                  |
|                                         |                        |       |       |                             | <i>Clostridium sensu stricto</i> ↓      |
|                                         |                        |       |       |                             | <i>Clostridium IV</i> ↓                 |
|                                         |                        |       |       |                             | <i>Catenibacterium</i> ↑                |
|                                         |                        |       |       |                             | <i>Clostridium XIVb</i> ↓               |
|                                         |                        |       |       |                             | <i>Prevotella</i> ↑                     |
|                                         |                        |       |       |                             | <i>Bacteroides</i> ↑                    |
|                                         |                        |       |       |                             | <i>Barnesiella</i> ↓                    |
|                                         |                        |       |       |                             | <i>Paraprevotella</i> ↑                 |
|                                         |                        |       |       |                             | <i>Odoribacter</i> ↓                    |
|                                         |                        |       |       |                             | <i>Butyricimonas</i> ↓                  |
|                                         |                        |       |       |                             | <i>Alistipes</i> ↓                      |
|                                         |                        |       |       |                             | <i>Escherichia/Shigella</i> ↓           |
|                                         |                        |       |       |                             | <i>Parasutterella</i> ↓                 |
|                                         |                        |       |       |                             | <i>Gemmiger</i> ↓                       |
|                                         |                        |       |       |                             | <i>Comamonas</i> ↓                      |
|                                         |                        |       |       |                             | <i>Bifidobacterium</i> ↓                |
|                                         |                        |       |       |                             | <i>Fusobacterium</i> ↓                  |
| Zeber-Lubecka et al. <sup>22</sup>      |                        |       |       | <i>Porphyromonadaceae</i> ↓ | <i>Alistipes</i> ↓                      |

| Author                            | Phylum                  | Class                        | Order                       | Family                         | Genus                                                                                                                                      |
|-----------------------------------|-------------------------|------------------------------|-----------------------------|--------------------------------|--------------------------------------------------------------------------------------------------------------------------------------------|
| Nagel et al. <sup>23</sup>        | F/B ratio ↑             | <i>Clostridia</i> ↑          | <i>Clostridiales</i> ↑      | <i>Streptococcaceae</i> ↑      | <i>Enterococcus</i> ↑                                                                                                                      |
|                                   |                         | <i>Firmicutes</i> ↑          | <i>Selenomonadales</i> ↓    | <i>Lachnospiraceae</i> ↑       | <i>Streptococcus</i> ↑                                                                                                                     |
|                                   |                         | <i>Bacteroidetes</i> ↓       | <i>Bacteroidales</i> ↓      | <i>Peptococcaceae I</i> ↓      | <i>Anaerostipes</i> ↑                                                                                                                      |
|                                   |                         | <i>Proteobacteria</i> ↑      | <i>Rhizobiales</i> ↑        | <i>Veillonellaceae</i> ↓       | <i>Blautia</i> ↑                                                                                                                           |
|                                   |                         | <i>Actinobacteria</i> ↑      | <i>Actinomycetales</i> ↑    | <i>Hyphomicrobiaceae</i> ↑     | <i>Lachnospiraceae_incertae_sedis</i> ↑                                                                                                    |
|                                   |                         |                              | <i>Methanobacteriales</i> ↑ | <i>Actinomycetaceae</i> ↑      | <i>Peptococcus</i> ↓                                                                                                                       |
|                                   |                         |                              |                             | <i>Methanobacteriaceae</i> ↑   | <i>Papillibacter</i> ↑                                                                                                                     |
|                                   |                         |                              |                             |                                | <i>Cantenibacterium</i> ↓                                                                                                                  |
|                                   |                         |                              |                             |                                | <i>Allisonella</i> ↓                                                                                                                       |
|                                   |                         |                              |                             |                                | <i>Dialister</i> ↓                                                                                                                         |
|                                   |                         |                              |                             |                                | <i>Butyricimonas</i> ↓                                                                                                                     |
|                                   |                         |                              |                             |                                | <i>Parabacteroides</i> ↓                                                                                                                   |
|                                   |                         |                              |                             |                                | <i>Gemmiger</i> ↑                                                                                                                          |
|                                   |                         |                              |                             |                                | <i>Actinomyces</i> ↑                                                                                                                       |
|                                   |                         |                              |                             |                                | <i>Eggethella</i> ↑                                                                                                                        |
|                                   |                         |                              |                             |                                | <i>Gordonibacter</i> ↑                                                                                                                     |
|                                   |                         |                              |                             |                                | <i>Olsenella</i> ↓                                                                                                                         |
|                                   |                         |                              |                             | <i>Methanobrevibacter</i> ↑    |                                                                                                                                            |
| Ringel-Kulka et al. <sup>24</sup> |                         |                              | <i>Lactobacillales</i> ↑    | <i>Lactobacillaceae</i> ↑      | <i>Lactobacillus</i> ↑                                                                                                                     |
|                                   |                         |                              | <i>Actinomycetales</i> ↑    | <i>Actinomycetaceae</i> ↑      | <i>Streptococcus</i> ↑                                                                                                                     |
|                                   |                         |                              |                             | <i>Incertae sedis XIII</i> ↓   | <i>Actinomyces</i> ↑                                                                                                                       |
|                                   |                         |                              |                             |                                | several members of the <i>Clostridiales</i> , <i>Oscillibacter</i> , <i>Anaerovorax</i> , and a member of the <i>Incertae sedis XIII</i> ↓ |
| Pozuelo et al. <sup>26</sup>      |                         |                              |                             | <i>Ruminococcaceae</i> ↓       | unknown <i>Ruminococcaceae</i> ↓                                                                                                           |
|                                   |                         |                              |                             | unknown <i>Clostridiales</i> ↓ |                                                                                                                                            |
|                                   |                         |                              |                             | <i>Erysipelotrichaceae</i> ↓   |                                                                                                                                            |
|                                   |                         |                              |                             | <i>Methanobacteriaceae</i> ↓   |                                                                                                                                            |
| Carroll et al. <sup>31</sup>      | V6:                     | V3:                          | V3:                         | V3:                            | V3:                                                                                                                                        |
|                                   | <i>Proteobacteria</i> ↑ | <i>Gammaproteobacteria</i> ↑ | <i>Clostridiales</i> ↓      | <i>Incertae Sedis XII</i> ↓    | <i>Pediococcus</i> ↑                                                                                                                       |
|                                   |                         | V6:                          | <i>Enterobacteriales</i> ↑  | <i>Peptococcaceae</i> ↑        | <i>Faecalibacterium</i> ↓                                                                                                                  |
|                                   |                         | <i>Gammaproteobacteria</i> ↑ | <i>Pseudomonadales</i> ↑    | <i>Ruminococcaceae</i> ↓       | <i>Unclassified Lactobacillaceae</i> ↑                                                                                                     |
|                                   |                         |                              | <i>Fusobacteriales</i> ↑    | <i>Lactobacillaceae</i> ↑      | <i>Unclassified Enterobacteriaceae</i> ↑                                                                                                   |
|                                   |                         |                              | V6:                         | <i>Enterobacteriaceae</i> ↑    | <i>Fusobacterium</i> ↑                                                                                                                     |
|                                   |                         |                              | <i>Lactobacillales</i> ↑    | <i>Pseudomonadaceae</i> ↑      | V6:                                                                                                                                        |
|                                   |                         |                              | <i>Enterobacteriales</i> ↑  | <i>Fusobacteriaceae</i> ↑      | <i>Ethanoligenens</i> ↑                                                                                                                    |
|                                   |                         |                              |                             | V6:                            | <i>Enterococcus</i> ↑                                                                                                                      |
|                                   |                         |                              |                             | <i>Ruminococcaceae</i> ↑       | <i>Veillonella</i> ↑                                                                                                                       |
|                                   |                         |                              |                             | <i>Enterococcaceae</i> ↑       | <i>Unclassified Enterobacteriaceae</i> ↑                                                                                                   |
|                                   |                         |                              | <i>Veillonellaceae</i> ↑    |                                |                                                                                                                                            |
|                                   |                         |                              | <i>Enterobacteriaceae</i> ↑ |                                |                                                                                                                                            |



| Author                                  | Phylum                  | Class               | Order                     | Family                       | Genus                                                                                                                                               |
|-----------------------------------------|-------------------------|---------------------|---------------------------|------------------------------|-----------------------------------------------------------------------------------------------------------------------------------------------------|
| Durbán et al. <sup>32</sup>             |                         |                     |                           | <i>Ruminococcaceae</i> ↓     | <i>Leuconostoc</i> ↑                                                                                                                                |
|                                         |                         |                     |                           | <i>Rikenellaceae</i> ↑       | <i>Odoribacter</i> ↑                                                                                                                                |
|                                         |                         |                     |                           | <i>Porphyromonadaceae</i> ↑  | <i>Acinetobacter</i> ↑                                                                                                                              |
|                                         |                         |                     |                           |                              | <i>Butyricimonas</i> ↑                                                                                                                              |
| <b>Studies involving IBS-C patients</b> |                         |                     |                           |                              |                                                                                                                                                     |
| Gobert et al. <sup>20</sup>             | <i>Proteobacteria</i> ↑ |                     |                           |                              | <i>Roseburia</i> ↓                                                                                                                                  |
|                                         |                         |                     |                           |                              | <i>Prevotella</i> ↑                                                                                                                                 |
|                                         |                         |                     |                           |                              | <i>Alistipes</i> ↑                                                                                                                                  |
|                                         |                         |                     |                           |                              | <i>Desulfovibrio</i> ↑                                                                                                                              |
|                                         |                         |                     |                           |                              | <i>Akkermensia</i> ↑                                                                                                                                |
| Zeber-Lubecka et al. <sup>22</sup>      | <i>Firmicutes</i> ↑     | <i>Clostridia</i> ↑ | <i>Clostridiales</i> ↑    | <i>Incertae Sedis XIII</i> ↑ | <i>Eubacterium</i> ↑                                                                                                                                |
|                                         |                         |                     |                           | <i>Lachnospiraceae</i> ↑     | <i>Acetanaerobacterium</i> ↑                                                                                                                        |
|                                         |                         |                     |                           | <i>Ruminococcaceae</i> ↑     | <i>Catenibacterium</i> ↑                                                                                                                            |
|                                         |                         |                     |                           | <i>Rhodospirillaceae</i> ↑   | <i>Uncultured Ruminococcaceae</i> ↑                                                                                                                 |
|                                         |                         |                     |                           | <i>Coriobacteriaceae</i> ↑   | <i>Bacteroides</i> ↓                                                                                                                                |
|                                         |                         |                     |                           |                              | <i>Granulicatella</i> ↑                                                                                                                             |
|                                         |                         |                     |                           |                              | <i>Parabacteroides</i> ↓                                                                                                                            |
| Ringel-Kulka et al. <sup>24</sup>       | <i>Actinobacteria</i> ↑ |                     | <i>Lactobacillales</i> ↑  | <i>Lactobacillaceae</i> ↑    | <i>Lactobacillus</i> ↑                                                                                                                              |
|                                         |                         |                     | <i>Actinomycetales</i> ↑  | <i>Actinomycetaceae</i> ↑    | <i>Streptococcus</i> ↑                                                                                                                              |
|                                         |                         |                     | <i>Coriobacteriales</i> ↑ | <i>Incertae sedis XIII</i> ↑ | <i>Actinomyces</i> ↑                                                                                                                                |
|                                         |                         |                     |                           | <i>Coriobacteriaceae</i> ↑   | <i>Anaerovorax</i> ↑                                                                                                                                |
|                                         |                         |                     |                           |                              | <i>Collinsiella</i> ↑                                                                                                                               |
| Durbán et al. <sup>32</sup>             |                         |                     |                           | <i>Ruminococcaceae</i> ↓     | <i>Alistipes</i> ↑                                                                                                                                  |
|                                         |                         |                     |                           | <i>Rikenellaceae</i> ↑       | <i>Butyricimonas</i> ↑                                                                                                                              |
|                                         |                         |                     |                           | <i>Porphyromonadaceae</i> ↑  |                                                                                                                                                     |
| <b>Studies involving IBS-M patients</b> |                         |                     |                           |                              |                                                                                                                                                     |
| Pozuelo et al. <sup>26</sup>            |                         |                     |                           | <i>Erysipelotrichaceae</i> ↓ |                                                                                                                                                     |
| Ringel-Kulka et al. <sup>24</sup>       |                         |                     | <i>Lactobacillales</i> ↑  | <i>Lactobacillaceae</i> ↑    | <i>Lactobacillus</i> ↑                                                                                                                              |
|                                         |                         |                     | <i>Actinomycetales</i> ↑  | <i>Actinomycetaceae</i> ↑    | <i>Streptococcus</i> ↑                                                                                                                              |
|                                         |                         |                     |                           | <i>Eubacteriaceae</i> ↓      | <i>Actinomyces</i> ↑                                                                                                                                |
|                                         |                         |                     |                           | <i>Incertae sedis XIII</i> ↓ | several members of the<br><i>Clostridiales</i> , <i>Oscillibacter</i> ,<br><i>Anaerovorax</i> , and a member of the<br><i>Incertae sedis XIII</i> ↓ |
|                                         |                         |                     |                           |                              | <i>Eubacterium</i> ↓                                                                                                                                |

IBS, irritable bowel syndrome; IBS-D, diarrhea-predominant irritable bowel syndrome; IBS-C, constipation-predominant irritable bowel syndrome; IBS-M, mixed irritable bowel syndrome.
